# Supplementary material for: Nanocarrier of α-Tocopheryl Succinate Based on a Copolymer Derivative of (4,7-dichloroquinolin-2-yl)methanol and Its Cytotoxicity against a Breast Cancer Cell Line
Source: MDPI journal article supplement (doi:10.3390/polym15224342), 2023-11-07
Supplement: s1 [file polymers-2516643-supplementary.pdf › polymers-2516643-supplementary.pdf]

Supporting material

# Nanocarrier of $\alpha$ -Tocopheryl Succinate based on a Copolymer Derivative of (4,7-dichloroquinolin-2-yl)methanol and its Cytotoxicity against a Breast Cancer Cell line

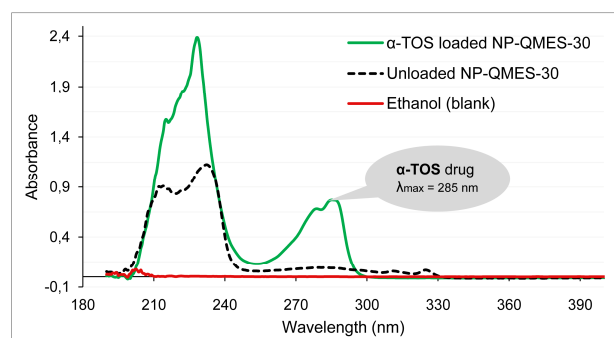

Figure S1. UV spectra of:  $\alpha$ -TOS loaded and unloaded NP-QMES-30.

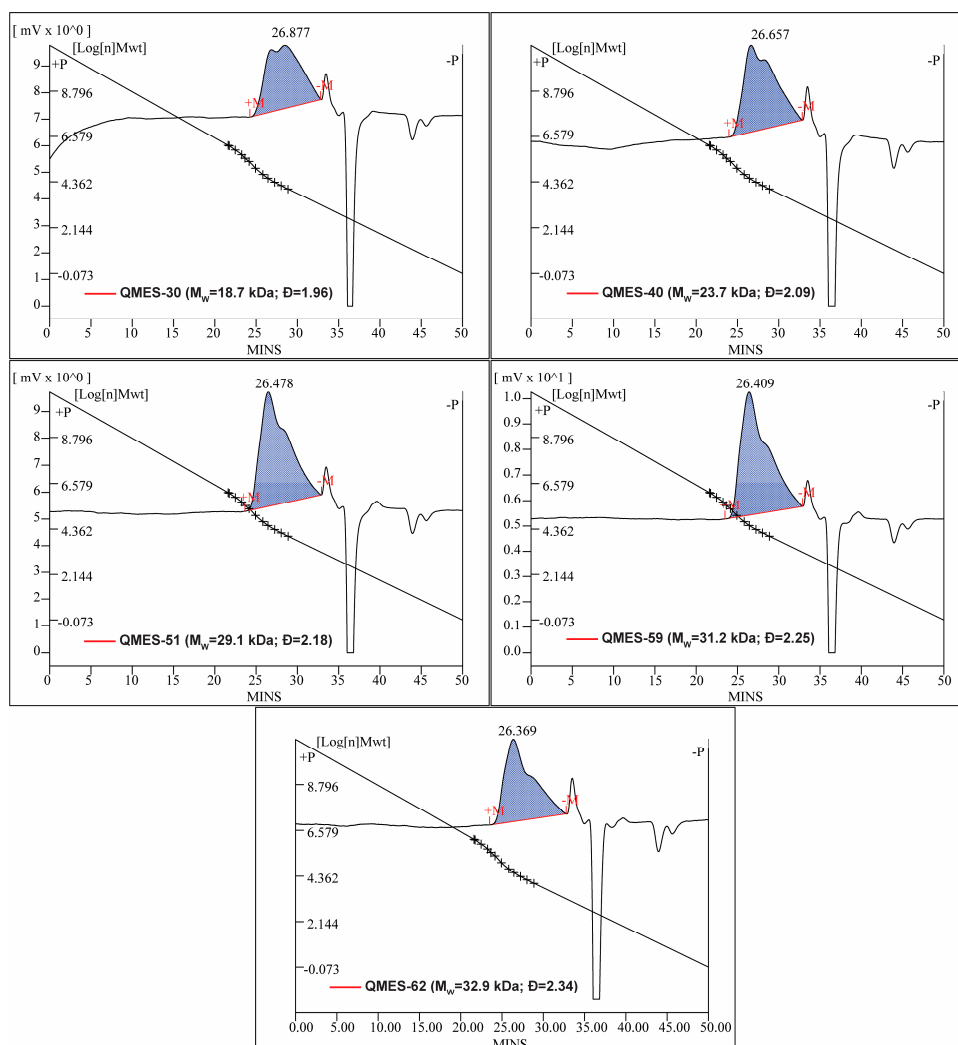

Figure S2. GPC chromatograms of the synthesized poly (QMES-co-VP) copolymers.

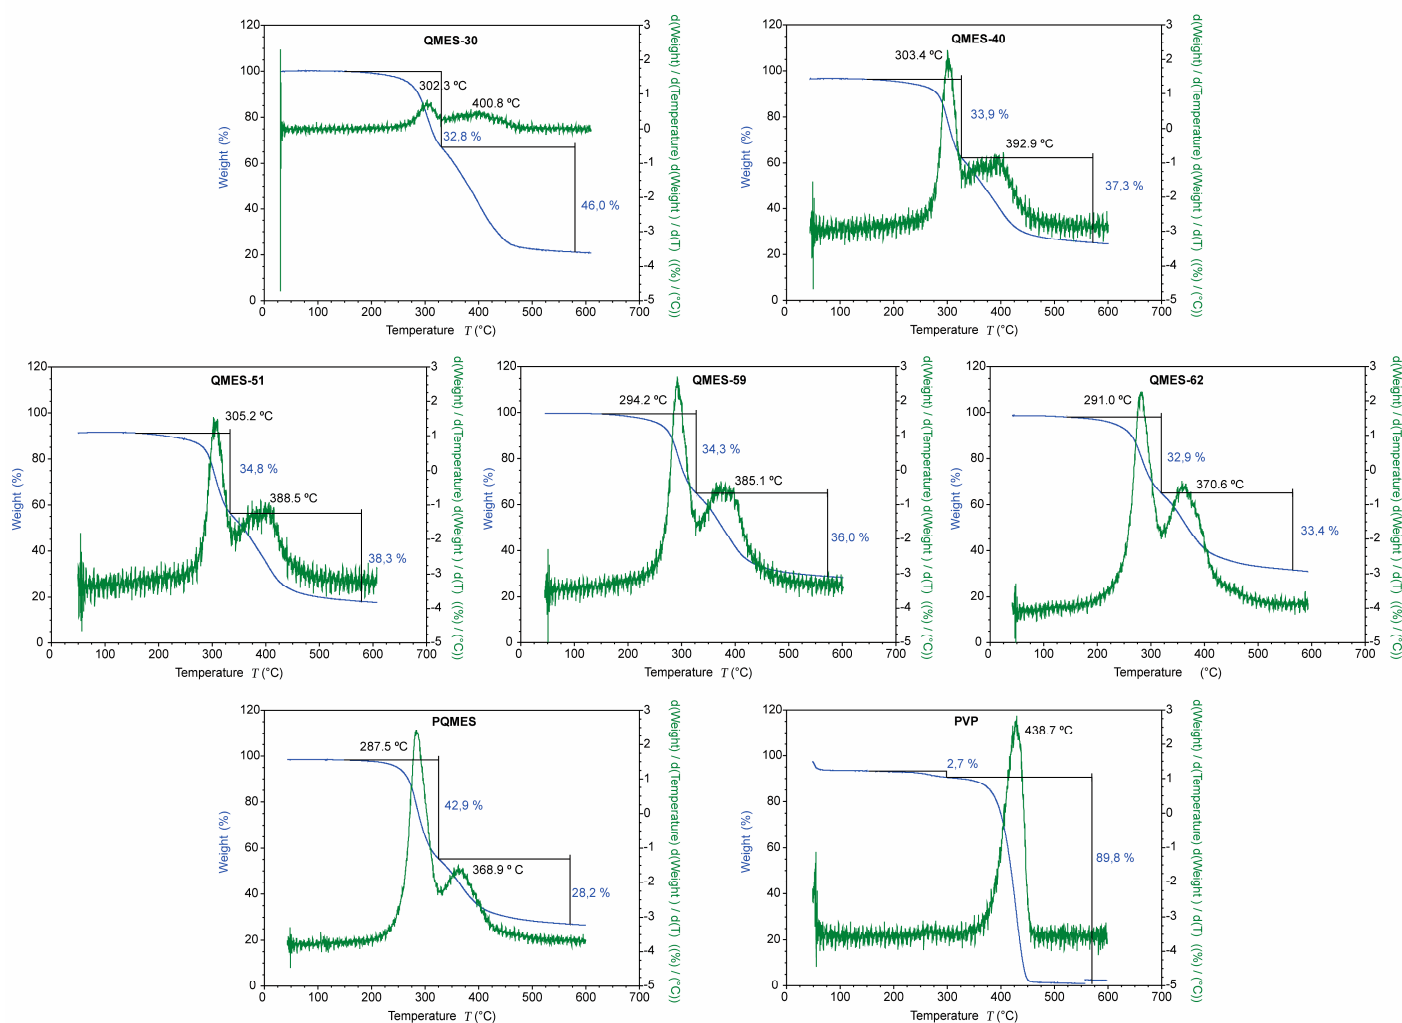

**Figure S3.** Results of thermogravimetric analysis (TGA) of PVP, PQMES and QMES-VP copolymers.

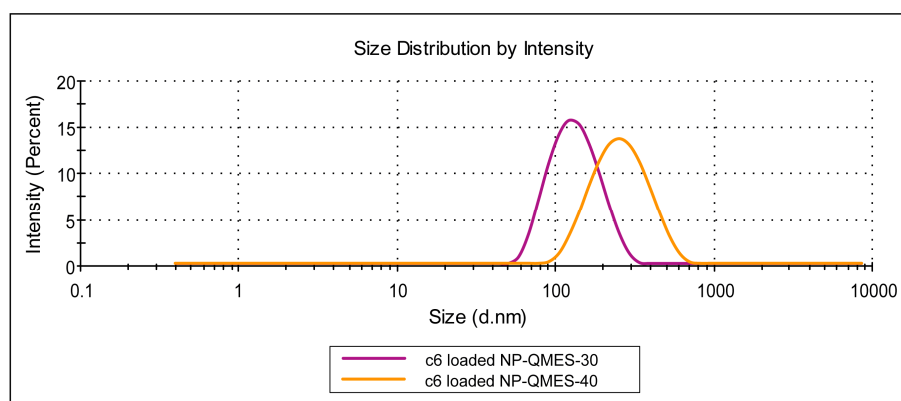

**Figure S4.** DLS size distribution curves of: c6 loaded NP-QMES-30 ( $D_h = 124.4 \pm 2.7$ ; PDI = 0.120) and c6 loaded NP-QMES-40 ( $D_h = 247.3 \pm 2.7$ ; PDI = 0.191).
